# Supplementary material
Source: PubMed Central journal article supplement (PMC2234269)
Supplement: NIHMS37236-supplement-04.pdf [file NIHMS37236-supplement-04.pdf]

**Supplementary Table 1: Serial mammary epithelial transplants of WT, p53+/-, and p53+/m epithelium into wildtype recipients**

| <b>p53 Genotype</b> | <b>Number of serial transplants</b> |
|---------------------|-------------------------------------|
| p53 +/+             | 7* (1**)<br>8 (2)                   |
| p53 +/-             | 11 (2)<br>13 (1)                    |
| p53 +/m             | 5 (3)<br>11 (1)                     |

\* The values represent the number of serial transplants performed. All genotypes were transplanted into wildtype recipients. Serial transplants were terminated when ductal outgrowth encompassed less than 10% of the gland. n=3-4 donors per genotype. n=5 recipients per transplant.

\*\*The values in parenthesis represent the number of donors which completed transplantation at this transplant generation.
